# Supplementary material for: TP53 p.Arg337His germline mutation prevalence in Southern Brazil: Further evidence for mutation testing in young breast cancer patients
Source: PubMed Central journal article supplement (PMC6312227; doi:10.1371/journal.pone.0209934), 2018-12-31
Supplement: pone.0209934.s001.pdf [file pone.0209934.s001.pdf]

Table S1: Epidemiological data collection of the study participants.

| Group | ID | Gender | Age at BC diagnosis (years) | Additional primary tumors | Personal history of cancer (other tumors) | Family history of BC | <i>TP53</i> p.Arg337His |
|-------|----|--------|-----------------------------|---------------------------|-------------------------------------------|----------------------|-------------------------|
| 1     | 1  | F      | 54                          | S                         | BREAST                                    | NS                   | N                       |
| 1     | 2  | F      | 32                          | NS                        |                                           | NS                   | N                       |
| 1     | 3  | F      | 55                          | N                         |                                           | N                    | N                       |
| 1     | 4  | F      | 51                          | NS                        |                                           | NS                   | N                       |
| 1     | 5  | F      | 47                          | N                         |                                           | NS                   | N                       |
| 1     | 6  | F      | 76                          | N                         |                                           | NS                   | N                       |
| 1     | 7  | F      | 45                          | S                         | BREAST                                    | NS                   | N                       |
| 1     | 8  | F      | 47                          | N                         |                                           | Y                    | N                       |
| 1     | 9  | F      | 57                          | N                         |                                           | N                    | N                       |
| 1     | 10 | F      | 44                          | N                         |                                           | N                    | N                       |
| 1     | 11 | F      | 31                          | NS                        |                                           | Y                    | N                       |
| 1     | 12 | F      | 52                          | NS                        |                                           | N                    | N                       |
| 1     | 13 | F      | 65                          | NS                        |                                           | N                    | N                       |
| 1     | 14 | F      | 28                          | NS                        |                                           | N                    | N                       |
| 1     | 15 | F      | 77                          | NS                        |                                           | N                    | N                       |
| 1     | 16 | F      | 61                          | NS                        |                                           | NS                   | N                       |
| 1     | 17 | F      | 46                          | NS                        |                                           | NS                   | N                       |
| 1     | 18 | F      | 44                          | N                         |                                           | N                    | N                       |
| 1     | 19 | F      | 51                          | N                         |                                           | N                    | N                       |
| 1     | 20 | F      | 43                          | NS                        |                                           | NS                   | N                       |
| 1     | 21 | F      | 66                          | N                         |                                           | NS                   | N                       |
| 1     | 22 | F      | 33                          | S                         | LUNG                                      | NS                   | N                       |
| 1     | 23 | F      | 68                          | N                         |                                           | NS                   | N                       |

|   |    |   |    |    |        |    |   |
|---|----|---|----|----|--------|----|---|
| 1 | 24 | F | 53 | N  |        | N  | N |
| 1 | 25 | F | 45 | NS |        | NS | N |
| 1 | 26 | F | 28 | S  | BREAST | N  | N |
| 1 | 27 | F | 31 | S  | BREAST | Y  | N |
| 1 | 28 | F | 61 | N  |        | N  | N |
| 1 | 29 | F | 52 | N  |        | Y  | N |
| 1 | 30 | F | 39 | N  |        | Y  | N |
| 1 | 31 | F | 60 | N  |        | N  | N |
| 1 | 32 | F | 45 | N  |        | N  | N |
| 1 | 33 | F | 51 | N  |        | Y  | N |
| 1 | 34 | F | 59 | N  |        | N  | N |
| 1 | 35 | F | 68 | N  |        | NS | N |
| 1 | 36 | F | 64 | N  |        | NS | N |
| 1 | 37 | F | 62 | N  |        | N  | N |
| 1 | 38 | F | 78 | N  |        | N  | N |
| 1 | 39 | F | 37 | N  |        | NS | N |
| 1 | 40 | F | 49 | N  |        | N  | N |
| 1 | 41 | F | 65 | N  |        | N  | N |
| 1 | 42 | F | 37 | N  |        | Y  | N |
| 1 | 43 | F | 56 | N  |        | N  | N |
| 1 | 44 | F | 52 | N  |        | Y  | N |
| 1 | 45 | F | 64 | N  |        | N  | N |
| 1 | 46 | F | 60 | S  | SKIN   | Y  | N |
| 1 | 47 | F | 49 | N  |        | Y  | N |
| 1 | 48 | F | 40 | S  | BREAST | N  | N |
| 1 | 49 | F | 80 | N  |        | N  | N |
| 1 | 50 | F | 69 | N  |        | NS | N |
| 1 | 51 | F | 43 | N  |        | N  | N |
| 1 | 52 | F | 59 | N  |        | N  | N |
| 1 | 53 | F | 60 | N  |        | N  | N |
| 1 | 54 | F | 50 | N  |        | Y  | N |
| 1 | 55 | F | 72 | N  |        | Y  | N |
| 1 | 56 | F | 85 | NS |        | NS | N |

|   |    |   |    |   |             |    |   |
|---|----|---|----|---|-------------|----|---|
| 1 | 57 | F | 43 | N |             | Y  | N |
| 1 | 58 | F | 44 | N |             | Y  | N |
| 1 | 59 | F | 65 | N |             | N  | N |
| 1 | 60 | F | 45 | N |             | N  | N |
| 1 | 61 | F | 84 | N |             | N  | N |
| 1 | 62 | F | 54 | N |             | N  | N |
| 1 | 63 | F | 49 | N |             | N  | N |
| 1 | 64 | F | 63 | N |             | Y  | N |
| 1 | 65 | F | 47 | S | BREAST      | Y  | N |
| 1 | 66 | F | 53 | N |             | N  | N |
| 1 | 67 | F | NS | N |             | Y  | N |
| 1 | 68 | F | 51 | N |             | Y  | N |
| 1 | 69 | F | 51 | S | ENDOMETRIAL | N  | N |
| 1 | 70 | F | 45 | S | HODGKIN     | NS | N |
| 1 | 71 | F | NS | N |             | N  | N |
| 1 | 72 | F | 53 | N |             | Y  | N |
| 1 | 73 | F | 46 | N |             | Y  | N |
| 1 | 74 | F | 76 | N |             | N  | N |
| 1 | 75 | F | 43 | N |             | N  | N |
| 1 | 76 | F | 44 | N |             | N  | N |
| 1 | 77 | F | 75 | N |             | N  | N |
| 1 | 78 | F | 60 | S | ENDOMETRIAL | N  | N |
| 1 | 79 | F | 54 | N |             | N  | N |
| 1 | 80 | F | 53 | N |             | N  | N |
| 1 | 81 | F | 45 | N |             | N  | N |
| 1 | 82 | F | 49 | N |             | Y  | N |
| 1 | 83 | F | 73 | N |             | Y  | N |
| 1 | 84 | F | 72 | N |             | N  | N |
| 1 | 85 | F | 61 | S | BREAST      | Y  | N |
| 1 | 86 | F | 38 | N |             | Y  | N |
| 1 | 87 | F | 45 | N |             | N  | N |
| 1 | 88 | F | 77 | N |             | N  | N |
| 1 | 89 | F | 54 | N |             | N  | N |
| 1 | 90 | F | 57 | N |             | N  | N |

|   |     |   |    |   |             |    |   |
|---|-----|---|----|---|-------------|----|---|
| 1 | 91  | F | 61 | N |             | Y  | N |
| 1 | 92  | F | 76 | S | ENDOMETRIAL | Y  | N |
| 1 | 93  | F | 66 | N |             | N  | N |
| 1 | 94  | F | 59 | N |             | N  | N |
| 1 | 95  | F | 46 | N |             | N  | N |
| 1 | 96  | F | 51 | N |             | N  | N |
| 1 | 97  | F | 56 | N |             | N  | N |
| 1 | 98  | F | 67 | S | STOMACH     | N  | P |
| 1 | 99  | F | 55 | N |             | Y  | N |
| 1 | 100 | F | 31 | N |             | N  | N |
| 1 | 101 | F | 74 | N |             | Y  | N |
| 1 | 102 | F | 64 | N |             | N  | N |
| 1 | 103 | F | 50 | N |             | Y  | N |
| 1 | 104 | F | 52 | N |             | Y  | N |
| 1 | 105 | F | 50 | N |             | N  | N |
| 1 | 106 | F | 37 | S | BREAST      | Y  | N |
| 1 | 107 | F | 40 | N |             | N  | N |
| 1 | 108 | F | 33 | N |             | N  | N |
| 1 | 109 | F | 46 | N |             | N  | N |
| 1 | 110 | F | 50 | N |             | NS | N |
| 1 | 111 | F | 39 | N |             | N  | N |
| 1 | 112 | F | 77 | N |             | N  | N |
| 1 | 113 | F | 41 | N |             | Y  | N |
| 1 | 114 | F | 66 | N |             | N  | N |
| 1 | 115 | F | 71 | N |             | Y  | N |
| 1 | 116 | F | 57 | N |             | N  | N |
| 1 | 117 | F | 41 | N |             | NS | N |
| 1 | 118 | F | 67 | N |             | N  | N |
| 1 | 119 | F | 71 | S | BREAST      | Y  | N |
| 1 | 120 | F | 38 | S | BREAST      | Y  | N |
| 1 | 121 | F | 56 | N |             | N  | N |
| 1 | 122 | F | 62 | S | BREAST      | N  | N |
| 1 | 123 | M | 35 | N |             | Y  | N |
| 1 | 124 | F | 56 | N |             | N  | N |

|   |     |   |    |    |             |    |   |
|---|-----|---|----|----|-------------|----|---|
| 1 | 125 | F | 51 | N  |             | N  | N |
| 1 | 126 | F | 71 | N  |             | Y  | N |
| 1 | 127 | F | 62 | S  | SKIN        | Y  | N |
| 1 | 128 | F | 54 | N  |             | Y  | N |
| 1 | 129 | F | 42 | N  |             | N  | N |
| 1 | 130 | F | 53 | N  |             | Y  | N |
| 1 | 131 | F | 50 | N  |             | N  | N |
| 1 | 132 | F | 60 | N  |             | Y  | N |
| 1 | 133 | F | 36 | N  |             | Y  | N |
| 1 | 134 | F | 63 | NS |             | Y  | N |
| 1 | 135 | F | 58 | N  |             | N  | N |
| 1 | 136 | F | 54 | N  |             | N  | N |
| 1 | 137 | M | 66 | N  |             | N  | N |
| 1 | 138 | F | 66 | N  |             | N  | N |
| 1 | 139 | F | 70 | N  |             | N  | N |
| 1 | 140 | F | 62 | N  |             | N  | N |
| 1 | 141 | F | 37 | N  |             | Y  | N |
| 1 | 142 | F | 31 | N  |             | N  | N |
| 1 | 143 | F | 32 | N  |             | N  | N |
| 1 | 144 | F | 77 | S  | SKIN        | N  | N |
| 1 | 145 | F | 45 | N  |             | N  | N |
| 1 | 146 | F | 33 | N  |             | N  | N |
| 1 | 147 | F | 73 | N  |             | Y  | N |
| 1 | 148 | F | 69 | N  |             | N  | N |
| 1 | 149 | F | 73 | N  |             | N  | N |
| 1 | 150 | F | 73 | N  |             | Y  | N |
| 1 | 151 | F | 73 | N  |             | N  | N |
| 1 | 152 | F | 71 | S  | ENDOMETRIAL | NS | N |
| 1 | 153 | F | 57 | N  |             | N  | N |
| 1 | 154 | F | NS | NS |             | NS | N |
| 1 | 155 | F | 77 | S  | VULVA       | N  | N |
| 1 | 156 | F | 50 | N  |             | N  | N |
| 1 | 157 | F | 47 | N  |             | N  | N |
| 1 | 158 | F | 41 | N  |             | N  | N |

|   |     |   |    |    |             |    |   |
|---|-----|---|----|----|-------------|----|---|
| 1 | 159 | F | 40 | N  |             | Y  | N |
| 1 | 160 | F | 55 | N  |             | N  | N |
| 1 | 161 | F | 68 | N  |             | NS | N |
| 1 | 162 | F | 53 | N  |             | N  | N |
| 1 | 163 | F | 51 | N  |             | N  | N |
| 1 | 164 | F | 64 | N  |             | NS | N |
| 1 | 165 | F | 58 | N  |             | N  | N |
| 1 | 166 | F | 28 | N  |             | N  | N |
| 1 | 167 | F | 59 | N  |             | Y  | N |
| 1 | 168 | F | 48 | NS |             | N  | N |
| 1 | 169 | F | 41 | NS |             | Y  | N |
| 1 | 170 | F | 69 | N  |             | NS | N |
| 1 | 171 | F | 67 | N  |             | Y  | N |
| 1 | 172 | F | 51 | N  |             | N  | N |
| 1 | 173 | F | 44 | N  |             | NS | N |
| 1 | 174 | F | 42 | N  |             | N  | N |
| 1 | 175 | F | 52 | N  |             | NS | N |
| 1 | 176 | F | 49 | NS |             | NS | N |
| 1 | 177 | F | 60 | N  |             | NS | N |
| 1 | 178 | F | 55 | N  |             | N  | N |
| 1 | 179 | F | 77 | N  |             | N  | N |
| 1 | 180 | F | 69 | S  | ENDOMETRIAL | N  | N |
| 1 | 181 | F | 74 | N  |             | N  | N |
| 1 | 182 | F | 74 | N  |             | N  | N |
| 1 | 183 | F | 78 | N  |             | Y  | N |
| 1 | 184 | F | 45 | N  |             | N  | N |
| 1 | 185 | F | 75 | S  | ENDOMETRIAL | N  | N |
| 1 | 186 | F | NS | N  |             | NS | N |
| 1 | 187 | F | 31 | N  |             | N  | N |
| 1 | 188 | F | 62 | N  |             | N  | N |
| 1 | 189 | F | 65 | N  |             | N  | N |
| 1 | 190 | F | 60 | N  |             | N  | N |
| 1 | 191 | F | 45 | N  |             | Y  | N |
| 1 | 192 | F | 56 | N  |             | N  | N |

|   |     |   |    |    |             |    |   |
|---|-----|---|----|----|-------------|----|---|
| 1 | 193 | F | 45 | N  |             | N  | N |
| 1 | 194 | F | 45 | N  |             | N  | N |
| 1 | 195 | F | 72 | S  | BLADDER     | Y  | N |
| 1 | 196 | F | 52 | N  |             | N  | N |
| 1 | 197 | F | 51 | N  |             | N  | N |
| 1 | 198 | F | 76 | N  |             | N  | N |
| 1 | 199 | F | 58 | N  |             | Y  | N |
| 1 | 200 | F | 46 | N  |             | N  | N |
| 1 | 201 | F | 67 | N  |             | Y  | N |
| 1 | 202 | F | 48 | N  |             | Y  | N |
| 1 | 203 | F | 73 | N  |             | N  | N |
| 1 | 204 | F | 43 | N  |             | NS | N |
| 1 | 205 | F | 50 | N  |             | Y  | N |
| 1 | 206 | F | 40 | N  |             | N  | N |
| 1 | 207 | F | 64 | N  |             | N  | N |
| 1 | 208 | F | 68 | N  |             | N  | N |
| 1 | 209 | F | 55 | NS |             | N  | N |
| 1 | 210 | F | 62 | N  |             | N  | N |
| 1 | 211 | F | 42 | N  |             | N  | N |
| 1 | 212 | F | 50 | N  |             | N  | N |
| 1 | 213 | F | 51 | S  | ENDOMETRIAL | Y  | N |
| 1 | 214 | F | 52 | N  |             | Y  | N |
| 1 | 215 | F | 45 | N  |             | NS | N |
| 1 | 216 | F | 69 | N  |             | Y  | N |
| 1 | 217 | F | 37 | N  |             | N  | N |
| 1 | 218 | F | 70 | N  |             | N  | N |
| 1 | 219 | F | 74 | N  |             | NS | N |
| 1 | 220 | F | 56 | N  |             | Y  | N |
| 1 | 221 | F | NS | NS |             | NS | N |
| 1 | 222 | F | 62 | N  |             | Y  | N |
| 1 | 223 | F | 45 | N  |             | N  | N |
| 1 | 224 | F | 54 | NS |             | NS | N |
| 1 | 225 | F | 79 | NS |             | N  | N |
| 1 | 226 | F | NS | N  |             | NS | N |

|   |     |   |    |    |                 |    |   |
|---|-----|---|----|----|-----------------|----|---|
| 1 | 227 | F | 52 | N  |                 | N  | N |
| 1 | 228 | F | 62 | N  |                 | N  | N |
| 1 | 229 | F | 65 | N  |                 | Y  | N |
| 1 | 230 | F | 70 | N  |                 | Y  | N |
| 1 | 231 | F | 72 | N  |                 | Y  | N |
| 1 | 232 | F | 55 | N  |                 | N  | N |
| 1 | 233 | F | 55 | N  |                 | Y  | N |
| 1 | 234 | F | 49 | N  |                 | N  | N |
| 1 | 235 | F | 81 | N  |                 | N  | N |
| 1 | 236 | F | 57 | N  |                 | Y  | N |
| 1 | 237 | F | 55 | S  | BREAST          | N  | N |
| 1 | 238 | F | 79 | N  |                 | N  | N |
| 1 | 239 | F | 62 | NS |                 | NS | N |
| 1 | 240 | F | 52 | N  |                 | N  | N |
| 1 | 241 | F | 63 | N  |                 | Y  | N |
| 1 | 242 | F | 48 | N  |                 | Y  | N |
| 1 | 243 | F | 57 | N  |                 | N  | N |
| 1 | 244 | F | 57 | N  |                 | Y  | N |
| 1 | 245 | F | 68 | N  |                 | N  | N |
| 1 | 246 | F | 66 | N  |                 | N  | N |
| 1 | 247 | F | 74 | N  |                 | Y  | N |
| 1 | 248 | F | 53 | N  |                 | N  | N |
| 1 | 249 | F | 54 | N  |                 | Y  | N |
| 1 | 250 | F | 62 | N  |                 | N  | N |
| 1 | 251 | F | 60 | S  | HODGKIN; BREAST | N  | N |
| 1 | 252 | F | 72 | N  |                 | N  | N |
| 1 | 253 | F | 60 | S  | COLORECTAL      | N  | N |
| 1 | 254 | F | 54 | N  |                 | N  | N |
| 1 | 255 | F | 63 | N  |                 | Y  | N |
| 1 | 256 | F | 70 | S  | COLORECTAL      | N  | N |
| 1 | 257 | F | 46 | N  |                 | Y  | N |
| 1 | 258 | F | 46 | N  |                 | Y  | N |
| 1 | 259 | F | NS | NS |                 | NS | N |
| 1 | 260 | F | 62 | N  |                 | N  | N |



|   |     |   |    |    |             |    |   |
|---|-----|---|----|----|-------------|----|---|
| 1 | 261 | F | 49 | N  |             | N  | N |
| 1 | 262 | F | 46 | N  |             | N  | N |
| 1 | 263 | F | 52 | N  |             | NS | N |
| 1 | 264 | F | 55 | N  |             | N  | N |
| 1 | 265 | F | 42 | N  |             | N  | N |
| 1 | 266 | F | 66 | N  |             | N  | N |
| 1 | 267 | F | 45 | NS |             | Y  | N |
| 1 | 268 | F | 50 | N  |             | Y  | N |
| 1 | 269 | F | 86 | N  |             | N  | N |
| 1 | 270 | F | 85 | N  |             | N  | N |
| 1 | 271 | F | 85 | N  |             | Y  | N |
| 1 | 272 | F | 34 | N  |             | Y  | N |
| 1 | 273 | F | 48 | S  | MUSCLE      | N  | N |
| 1 | 274 | F | 64 | N  |             | N  | N |
| 1 | 275 | F | 57 | N  |             | N  | N |
| 1 | 276 | F | 50 | N  |             | Y  | N |
| 1 | 277 | F | 46 | N  |             | N  | N |
| 1 | 278 | F | 57 | N  |             | N  | N |
| 1 | 279 | F | 64 | N  |             | N  | N |
| 1 | 280 | F | 79 | N  |             | N  | N |
| 1 | 281 | F | 29 | NS |             | Y  | N |
| 1 | 282 | F | 60 | N  |             | Y  | N |
| 1 | 283 | F | 38 | N  |             | Y  | N |
| 1 | 284 | F | 47 | N  |             | N  | N |
| 1 | 285 | F | 62 | N  |             | Y  | N |
| 1 | 286 | F | 56 | N  |             | N  | N |
| 1 | 287 | F | 73 | N  |             | N  | N |
| 1 | 288 | F | 43 | N  |             | N  | N |
| 1 | 289 | F | 78 | N  |             | NS | N |
| 1 | 290 | F | 76 | N  |             | Y  | N |
| 1 | 291 | F | 62 | S  | ENDOMETRIAL | Y  | N |
| 1 | 292 | F | 70 | N  |             | N  | N |
| 1 | 293 | F | 71 | N  |             | Y  | N |
| 1 | 294 | F | 79 | N  |             | Y  | N |

|   |     |   |    |    |             |    |   |
|---|-----|---|----|----|-------------|----|---|
| 1 | 295 | F | 67 | N  |             | N  | N |
| 1 | 296 | F | NS | N  |             | NS | N |
| 1 | 297 | F | 46 | N  |             | Y  | N |
| 1 | 298 | F | 56 | N  |             | N  | N |
| 1 | 299 | F | NS | NS |             | NS | N |
| 1 | 300 | F | 89 | N  |             | N  | N |
| 1 | 301 | F | 49 | N  |             | N  | N |
| 1 | 302 | F | 36 | N  |             | N  | N |
| 1 | 303 | F | 86 | N  |             | N  | N |
| 1 | 304 | F | 64 | S  | BREAST      | N  | N |
| 1 | 305 | F | 64 | N  |             | N  | N |
| 1 | 306 | F | 63 | N  |             | N  | N |
| 1 | 307 | F | 57 | N  |             | Y  | N |
| 1 | 308 | F | 44 | N  |             | Y  | N |
| 1 | 309 | F | 58 | N  |             | Y  | N |
| 1 | 310 | F | 57 | N  |             | Y  | N |
| 1 | 311 | F | 44 | N  |             | N  | N |
| 1 | 312 | F | 70 | N  |             | N  | N |
| 1 | 313 | F | 37 | N  |             | N  | N |
| 1 | 314 | F | 40 | S  | ENDOMETRIAL | Y  | N |
| 1 | 315 | F | 49 | N  |             | Y  | N |
| 2 | 316 | F | 33 | Y  | ENDOMETRIAL | N  | N |
| 2 | 317 | F | 23 | N  |             | Y  | P |
| 2 | 318 | F | 32 | Y  | COLORECTAL  | N  | N |
| 2 | 319 | F | 23 | N  |             | N  | N |
| 2 | 320 | F | 24 | N  |             | N  | N |
| 2 | 321 | F | 24 | N  |             | N  | N |
| 2 | 322 | F | 24 | N  |             | Y  | N |
| 2 | 323 | F | 26 | N  |             | N  | N |
| 2 | 324 | F | 26 | N  |             | N  | N |
| 2 | 325 | F | 26 | N  |             | Y  | N |
| 2 | 326 | F | 27 | Y  | BREAST      | Y  | N |
| 2 | 327 | F | 27 | N  |             | N  | N |
| 2 | 328 | F | 27 | N  |             | N  | N |

|   |     |   |    |   |        |   |   |
|---|-----|---|----|---|--------|---|---|
| 2 | 329 | F | 28 | N |        | N | N |
| 2 | 330 | F | 28 | N |        | N | N |
| 2 | 331 | F | 28 | N |        | Y | N |
| 2 | 332 | F | 28 | N |        | Y | N |
| 2 | 333 | F | 29 | N |        | Y | N |
| 2 | 334 | F | 29 | Y | BREAST | N | N |
| 2 | 335 | F | 29 | N |        | Y | N |
| 2 | 336 | F | 29 | Y | BREAST | Y | N |
| 2 | 337 | F | 29 | N |        | Y | N |
| 2 | 338 | F | 29 | N |        | N | N |
| 2 | 339 | F | 30 | N |        | Y | N |
| 2 | 340 | F | 30 | N |        | Y | N |
| 2 | 341 | F | 30 | N |        | Y | N |
| 2 | 342 | F | 30 | N |        | N | N |
| 2 | 343 | F | 30 | N |        | N | N |
| 2 | 344 | F | 30 | N |        | Y | N |
| 2 | 345 | F | 30 | N |        | Y | N |
| 2 | 346 | F | 30 | N |        | Y | N |
| 2 | 347 | F | 30 | N |        | Y | N |
| 2 | 348 | F | 30 | N |        | Y | N |
| 2 | 349 | F | 31 | N |        | Y | N |
| 2 | 350 | F | 31 | N |        | Y | N |
| 2 | 351 | F | 31 | N |        | N | N |
| 2 | 352 | F | 31 | N |        | N | N |
| 2 | 353 | F | 31 | N |        | Y | P |
| 2 | 354 | F | 31 | N |        | N | N |
| 2 | 355 | F | 31 | N |        | N | N |
| 2 | 356 | F | 31 | N |        | Y | N |
| 2 | 357 | F | 32 | N |        | Y | N |
| 2 | 358 | F | 32 | N |        | Y | N |
| 2 | 359 | F | 33 | Y | BREAST | Y | N |
| 2 | 360 | F | 32 | N |        | N | N |
| 2 | 361 | F | 32 | N |        | Y | N |
| 2 | 362 | F | 32 | N |        | N | N |

|   |     |   |    |   |        |   |   |
|---|-----|---|----|---|--------|---|---|
| 2 | 363 | F | 32 | N |        | N | N |
| 2 | 364 | F | 32 | N |        | Y | N |
| 2 | 365 | F | 32 | N |        | Y | N |
| 2 | 366 | F | 32 | N |        | N | N |
| 2 | 367 | F | 32 | N |        | N | N |
| 2 | 368 | F | 32 | N |        | Y | N |
| 2 | 369 | F | 32 | N |        | Y | N |
| 2 | 370 | F | 33 | N |        | Y | N |
| 2 | 371 | F | 33 | N |        | N | N |
| 2 | 372 | F | 33 | N |        | N | N |
| 2 | 373 | F | 33 | N |        | Y | N |
| 2 | 374 | F | 33 | N |        | Y | N |
| 2 | 375 | F | 33 | N |        | N | N |
| 2 | 376 | F | 33 | N |        | N | N |
| 2 | 377 | F | 34 | Y | BREAST | N | N |
| 2 | 378 | F | 33 | N |        | N | N |
| 2 | 379 | F | 33 | N |        | Y | N |
| 2 | 380 | F | 33 | N |        | N | N |
| 2 | 381 | F | 33 | N |        | Y | P |
| 2 | 382 | F | 35 | Y | BREAST | Y | N |
| 2 | 383 | F | 34 | N |        | Y | N |
| 2 | 384 | F | 34 | N |        | N | N |
| 2 | 385 | F | 34 | N |        | N | N |
| 2 | 386 | F | 34 | N |        | Y | N |
| 2 | 387 | F | 34 | N |        | Y | N |
| 2 | 388 | F | 35 | Y | BREAST | Y | N |
| 2 | 389 | F | 34 | N |        | Y | N |
| 2 | 390 | F | 34 | N |        | N | N |
| 2 | 391 | F | 34 | N |        | Y | N |
| 2 | 392 | F | 34 | N |        | Y | N |
| 2 | 393 | F | 34 | N |        | Y | N |
| 2 | 394 | F | 34 | N |        | N | N |
| 2 | 395 | F | 35 | N |        | N | N |
| 2 | 396 | F | 35 | Y | BREAST | Y | N |

|   |     |   |    |   |        |   |   |
|---|-----|---|----|---|--------|---|---|
| 2 | 397 | F | 35 | N |        | Y | N |
| 2 | 398 | F | 35 | N |        | Y | N |
| 2 | 399 | F | 35 | N |        | Y | N |
| 2 | 400 | F | 35 | N |        | N | N |
| 2 | 401 | F | 37 | Y | BREAST | Y | N |
| 2 | 402 | F | 37 | Y | BREAST | Y | N |
| 2 | 403 | F | 35 | N |        | N | N |
| 2 | 404 | F | 35 | N |        | N | N |
| 2 | 405 | F | 35 | N |        | N | N |
| 2 | 406 | F | 35 | N |        | Y | N |
| 2 | 407 | F | 35 | N |        | N | N |
| 2 | 408 | F | 39 | Y | BREAST | Y | N |
| 2 | 409 | F | 35 | N |        | N | N |
| 2 | 410 | F | 35 | N |        | N | N |
| 2 | 411 | F | 35 | N |        | Y | N |
| 2 | 412 | F | 35 | N |        | Y | N |
| 2 | 413 | F | 35 | N |        | N | N |
| 2 | 414 | F | 35 | N |        | N | N |
| 2 | 415 | F | 36 | N |        | Y | N |
| 2 | 416 | F | 36 | N |        | Y | N |
| 2 | 417 | F | 36 | N |        | Y | N |
| 2 | 418 | F | 36 | N |        | N | N |
| 2 | 419 | F | 36 | N |        | N | N |
| 2 | 420 | F | 36 | N |        | Y | N |
| 2 | 421 | F | 36 | N |        | Y | N |
| 2 | 422 | F | 36 | N |        | Y | N |
| 2 | 423 | F | 36 | N |        | Y | N |
| 2 | 424 | F | 36 | N |        | Y | N |
| 2 | 425 | F | 37 | N |        | Y | N |
| 2 | 426 | F | 37 | N |        | Y | N |
| 2 | 427 | F | 37 | N |        | Y | N |
| 2 | 428 | F | 37 | N |        | N | N |
| 2 | 429 | F | 37 | N |        | N | N |
| 2 | 430 | F | 39 | Y | BREAST | Y | N |

|   |     |   |    |   |        |    |   |
|---|-----|---|----|---|--------|----|---|
| 2 | 431 | F | 42 | Y | BREAST | N  | N |
| 2 | 432 | F | 37 | N |        | Y  | N |
| 2 | 433 | F | 37 | N |        | N  | N |
| 2 | 434 | F | 37 | N |        | Y  | N |
| 2 | 435 | F | 37 | N |        | N  | N |
| 2 | 436 | F | 37 | N |        | N  | N |
| 2 | 437 | F | 37 | N |        | Y  | N |
| 2 | 438 | F | 37 | N |        | Y  | N |
| 2 | 439 | F | 37 | N |        | N  | N |
| 2 | 440 | F | 37 | N |        | N  | N |
| 2 | 441 | F | 38 | N |        | N  | N |
| 2 | 442 | F | 38 | N |        | Y  | N |
| 2 | 443 | M | 38 | N |        | Y  | N |
| 2 | 444 | F | 38 | N |        | Y  | N |
| 2 | 445 | F | 38 | N |        | Y  | N |
| 2 | 446 | F | 38 | N |        | N  | N |
| 2 | 447 | F | 38 | N |        | Y  | N |
| 2 | 448 | F | 38 | N |        | N  | N |
| 2 | 449 | F | 38 | N |        | Y  | N |
| 2 | 450 | F | 38 | N |        | N  | N |
| 2 | 451 | F | 38 | N |        | Y  | N |
| 2 | 452 | F | 38 | N |        | NS | N |
| 2 | 453 | F | 38 | N |        | Y  | N |
| 2 | 454 | F | 38 | N |        | Y  | N |
| 2 | 455 | F | 38 | N |        | Y  | N |
| 2 | 456 | F | 39 | N |        | N  | N |
| 2 | 457 | F | 39 | N |        | Y  | N |
| 2 | 458 | F | 39 | N |        | Y  | N |
| 2 | 459 | F | 39 | N |        | Y  | N |
| 2 | 460 | F | 39 | N |        | Y  | N |
| 2 | 461 | F | 39 | N |        | NS | N |
| 2 | 462 | F | 39 | N |        | Y  | N |
| 2 | 463 | F | 39 | N |        | N  | N |
| 2 | 464 | F | 39 | N |        | Y  | N |

|   |     |   |    |   |        |    |   |
|---|-----|---|----|---|--------|----|---|
| 2 | 465 | F | 39 | N |        | Y  | N |
| 2 | 466 | F | 39 | N |        | N  | N |
| 2 | 467 | F | 39 | N |        | Y  | N |
| 2 | 468 | F | 39 | N |        | Y  | N |
| 2 | 469 | F | 39 | N |        | Y  | N |
| 2 | 470 | F | 39 | N |        | N  | N |
| 2 | 471 | F | 39 | N |        | Y  | N |
| 2 | 472 | F | 43 | Y | BREAST | N  | N |
| 2 | 473 | F | 44 | Y | BREAST | Y  | N |
| 2 | 474 | F | 40 | N |        | Y  | N |
| 2 | 475 | F | 40 | N |        | Y  | N |
| 2 | 476 | F | 40 | N |        | Y  | N |
| 2 | 477 | F | 40 | N |        | N  | N |
| 2 | 478 | F | 40 | N |        | Y  | N |
| 2 | 479 | F | 40 | N |        | Y  | N |
| 2 | 480 | F | 40 | N |        | Y  | N |
| 2 | 481 | F | 40 | N |        | Y  | P |
| 2 | 482 | F | 40 | N |        | Y  | N |
| 2 | 483 | F | 40 | N |        | Y  | N |
| 2 | 484 | F | 40 | N |        | Y  | N |
| 2 | 485 | M | 41 | N |        | N  | N |
| 2 | 486 | F | 41 | N |        | N  | N |
| 2 | 487 | F | 41 | N |        | N  | N |
| 2 | 488 | F | 41 | N |        | Y  | N |
| 2 | 489 | F | 41 | N |        | Y  | N |
| 2 | 490 | F | 41 | N |        | N  | N |
| 2 | 491 | F | 41 | N |        | N  | N |
| 2 | 492 | F | 41 | N |        | Y  | N |
| 2 | 493 | F | 41 | N |        | N  | N |
| 2 | 494 | F | 41 | N |        | Y  | N |
| 2 | 495 | F | 41 | N |        | NS | N |
| 2 | 496 | F | 41 | N |        | Y  | N |
| 2 | 497 | F | 41 | N |        | Y  | N |
| 2 | 498 | F | 41 | N |        | N  | N |

|   |     |   |    |   |          |    |   |
|---|-----|---|----|---|----------|----|---|
| 2 | 499 | F | 41 | N |          | Y  | N |
| 2 | 500 | F | 41 | N |          | NS | N |
| 2 | 501 | F | 41 | N |          | N  | N |
| 2 | 502 | F | 41 | N |          | N  | N |
| 2 | 503 | F | 43 | Y | SKIN     | NS | N |
| 2 | 504 | F | 42 | N |          | Y  | N |
| 2 | 505 | F | 42 | N |          | N  | N |
| 2 | 506 | F | 42 | N |          | Y  | N |
| 2 | 507 | F | 42 | N |          | Y  | N |
| 2 | 508 | F | 42 | N |          | Y  | N |
| 2 | 509 | F | 42 | Y | OVARY    | Y  | N |
| 2 | 510 | F | 42 | N |          | N  | N |
| 2 | 511 | F | 42 | N |          | N  | N |
| 2 | 512 | F | 42 | N |          | Y  | N |
| 2 | 513 | F | 42 | N |          | Y  | N |
| 2 | 514 | F | 35 | Y | OVARY    | Y  | N |
| 2 | 515 | F | 42 | N |          | Y  | N |
| 2 | 516 | F | 42 | Y | PANCREAS | Y  | P |
| 2 | 517 | F | 42 | N |          | Y  | N |
| 2 | 518 | F | 43 | N |          | Y  | N |
| 2 | 519 | F | 43 | N |          | N  | N |
| 2 | 520 | F | 43 | N |          | Y  | N |
| 2 | 521 | F | 43 | N |          | N  | N |
| 2 | 522 | F | 43 | N |          | Y  | N |
| 2 | 523 | F | 23 | Y | PAROTID  | N  | N |
| 2 | 524 | F | 43 | N |          | N  | N |
| 2 | 525 | F | 23 | Y | BREAST   | Y  | N |
| 2 | 526 | F | 43 | N |          | N  | N |
| 2 | 527 | F | 43 | N |          | Y  | N |
| 2 | 528 | F | 43 | N |          | N  | N |
| 2 | 529 | F | 43 | N |          | Y  | N |
| 2 | 530 | F | 43 | N |          | Y  | P |
| 2 | 531 | F | 43 | N |          | Y  | N |
| 2 | 532 | F | 43 | N |          | N  | N |



|   |     |   |    |   |  |   |   |
|---|-----|---|----|---|--|---|---|
| 2 | 533 | F | 44 | N |  | N | N |
| 2 | 534 | F | 42 | N |  | N | N |
| 2 | 535 | F | 44 | N |  | Y | N |
| 2 | 536 | F | 44 | N |  | N | N |
| 2 | 537 | F | 44 | N |  | N | N |
| 2 | 538 | F | 44 | N |  | N | N |
| 2 | 539 | F | 44 | N |  | Y | N |
| 2 | 540 | F | 44 | N |  | Y | N |
| 2 | 541 | F | 44 | N |  | N | N |
| 2 | 542 | F | 44 | N |  | N | N |
| 2 | 543 | F | 44 | N |  | Y | N |
| 2 | 544 | F | 44 | N |  | Y | N |
| 2 | 545 | F | 45 | N |  | N | N |
| 2 | 546 | F | 45 | N |  | N | N |
| 2 | 547 | F | 45 | N |  | N | N |
| 2 | 548 | F | 45 | N |  | Y | N |
| 2 | 549 | F | 45 | N |  | Y | N |
| 2 | 550 | F | 45 | N |  | Y | N |
| 2 | 551 | F | 45 | N |  | Y | N |
| 2 | 552 | F | 45 | N |  | N | N |
| 2 | 553 | F | 45 | N |  | Y | N |
| 2 | 554 | F | 37 | N |  | Y | N |

Table legend:

ID: participant identification number

1: group 1 (patients unselected for age of diagnosis and family history).

2: group 2 (patients diagnosed before 46 years and without Chompret criteria for Li-Fraumeni or Li-Fraumeni-like Syndromes).

F: female

M: Male

N: No

Y: Yes

NS: Not specified

BC: Breast Cancer
